# Supplementary material for: Three-Dimensional Bioprinting with Alginate by Freeform Reversible Embedding of Suspended Hydrogels with Tunable Physical Properties and Cell Proliferation
Source: MDPI journal article supplement (doi:10.3390/bioengineering9120807), 2022-12-15
Supplement: s1 [file s1]

*Supplementary Materials*

# Three-Dimensional Bioprinting with Alginate by Freeform Reversible Embedding of Suspended Hydrogels with Tunable Physical Properties and Cell Proliferation

Yuanjia Zhu <sup>1,2</sup>, Charles J. Stark <sup>1</sup>, Sarah Madira <sup>1</sup>, Sidarth Ethiraj <sup>1</sup>, Akshay Venkatesh <sup>1</sup>, Shreya Anilkumar <sup>1</sup>, Jinsuh Jung <sup>1</sup>, Seunghyun Lee <sup>1</sup>, Catherine A. Wu <sup>1</sup>, Sabrina K. Walsh <sup>1</sup>, Gabriel A. Stankovich <sup>1</sup> and Yi-Ping Joseph Woo <sup>1,2,\*</sup>

<sup>1</sup> Department of Cardiothoracic Surgery, Stanford University, Stanford, CA 94305, USA

<sup>2</sup> Department of Bioengineering, Stanford University, Stanford, CA 94305, USA

\* Correspondence: joswoo@stanford.edu

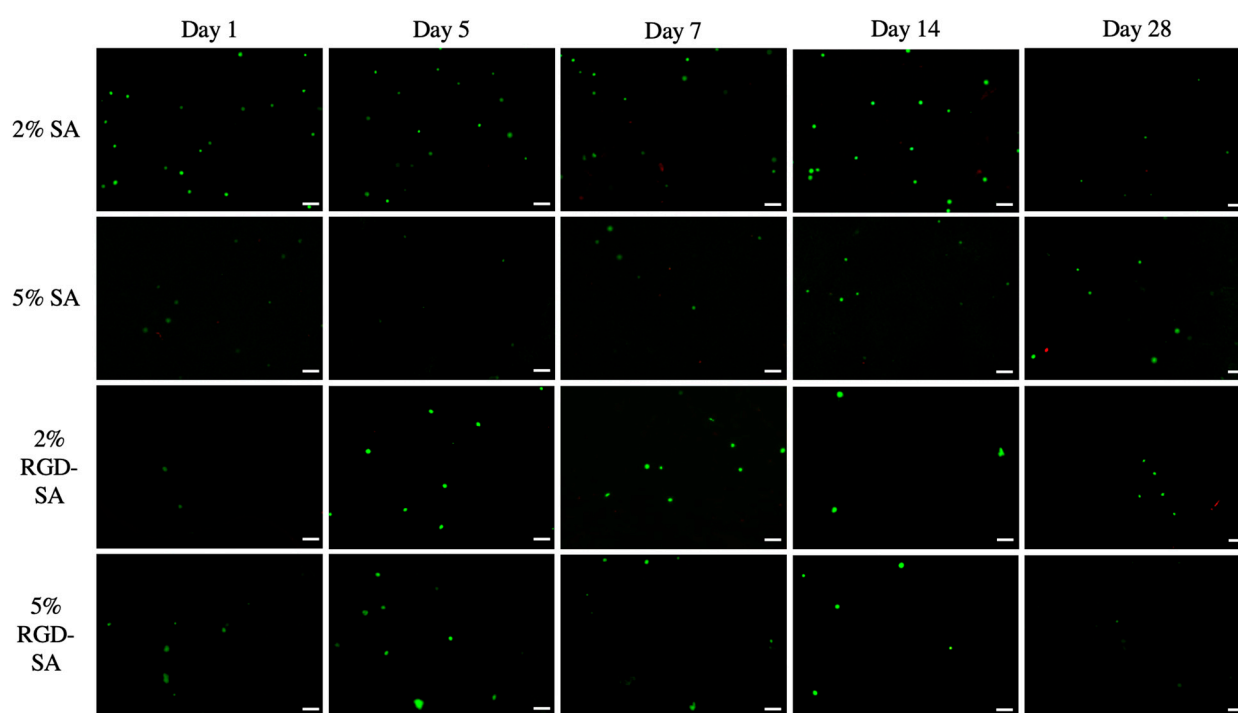

**Figure S1.** Exemplary live dead images of adult human dermal fibroblasts in different alginate bio-inks after 3D printing over 28 days. Scale bar = 100  $\mu$ m. SA: sodium alginate; RGD-SA: RGD-modified sodium alginate.

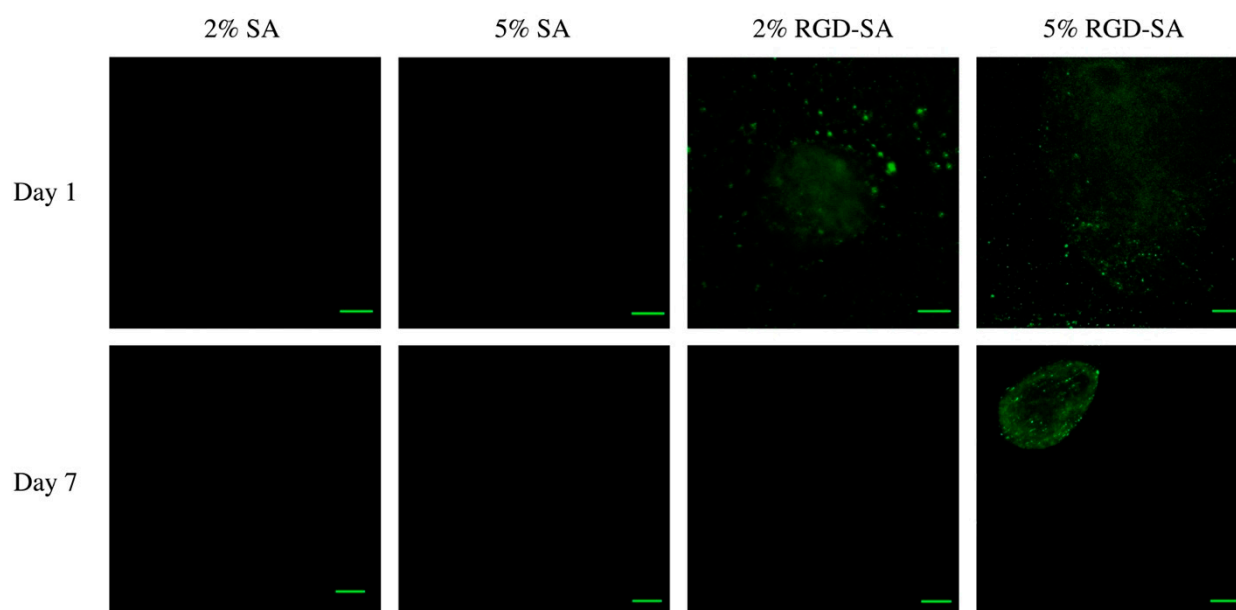

**Figure S2.** Integrin signals of cells printed in alginates 1 and 7 days after bioprinting. Integrin was present in both RGD-modified alginates 1 day after bioprinting, but after 7 days of culturing, only 5% RGD-SA demonstrated enhanced integrin signals with clustering. SA: sodium alginate. Scale bar = 5  $\mu$ m.

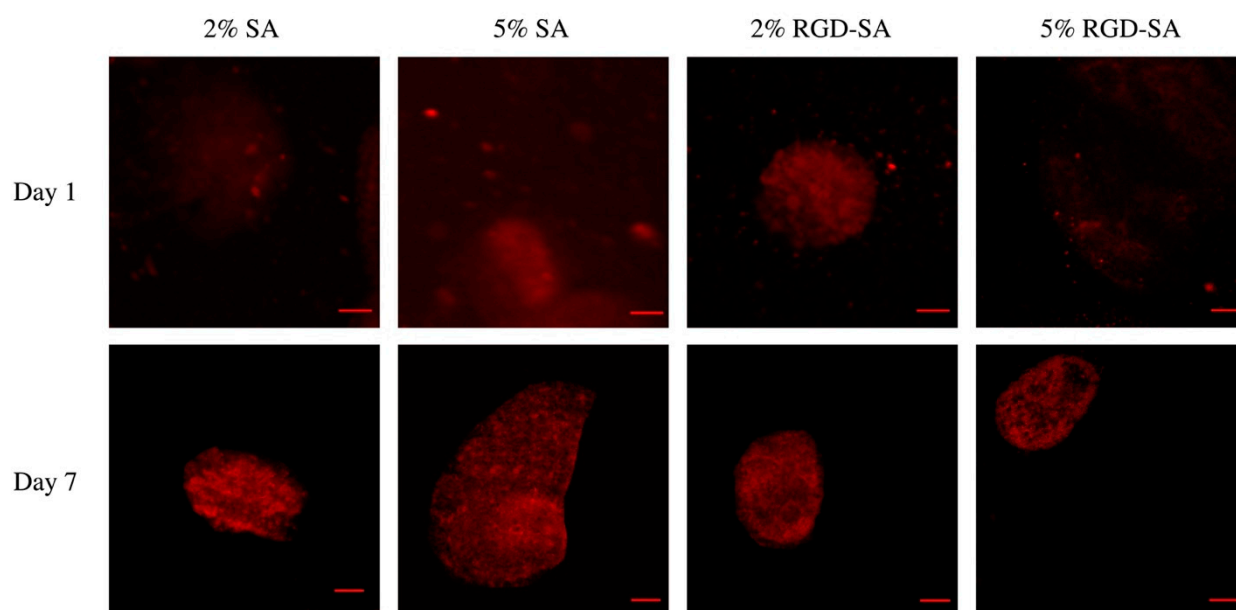

**Figure S3.** Actin signals of cells printed in alginates 1 and 7 days after bioprinting. Actin signals were well visualized in different alginates at both 1 and 7 days after bioprinting. More pronounced actin formalization was observed after 7 days compared to 1 day after bioprinting. SA: sodium alginate. RGD-SA: RGD-modified sodium alginate. Scale bar = 5  $\mu$ m.

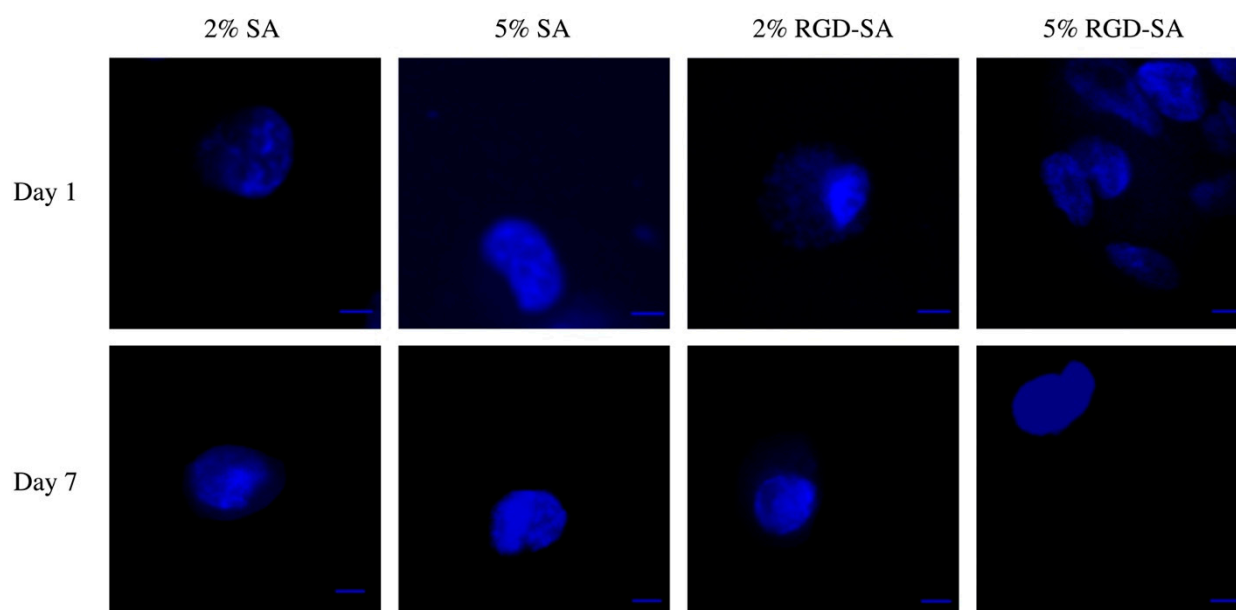

**Figure S4.** DAPI signals of cells printed in alginates 1 and 7 days after bioprinting. No changes in DAPI signals were observed in different alginates at 1 and 7 days after bioprinting. SA: sodium alginate. RGD-SA: RGD-modified sodium alginate. Scale bar = 5  $\mu$ m.
